# Supplementary material for: Rate coefficients for the reaction of OH radicals with cis-3-hexene: an experimental and theoretical study
Source: Royal Society of Chemistry journal article supplement (doi:10.1039/c4cp05760k), 2015-01-01
Supplement: c4cp05760k1.pdf [file c4cp05760k1.pdf]

## Supplementary Material

### Contents

|                                                                                                                                                                                                                                                                                                                                 |            |    |                            |    |
|---------------------------------------------------------------------------------------------------------------------------------------------------------------------------------------------------------------------------------------------------------------------------------------------------------------------------------|------------|----|----------------------------|----|
| A: Cartesian coordinates (angstroms), vibrational frequencies (cm-1) and electronic energies (hartrees) for the stationary points on the cis-3-hexene + OH Potential Energy Surface                                                                                                                                             | calculated | at | BHandHLYP/cc-pVDZ.....     | 2  |
| B: Cartesian coordinates (angstroms), vibrational frequencies (cm-1) and electronic energies (hartrees) for the stationary points on the cis-3-hexene + OH Potential Energy Surface                                                                                                                                             | calculated | at | BHandHLYP/aug-cc-pVDZ..... | 15 |
| C: Plot of the kinetic data for the reaction of cis-3-hexene with OH radicals using allyl ether as reference compound. $[S]_0$ and $[S]_t$ are the concentrations of the cis-3-hexene at times 0 and t, respectively, $[R]_0$ and $[R]_t$ are the concentrations of the reference compound at times 0 and t, respectively.....  |            |    |                            | 28 |
| D: Plot of the kinetic data for the reaction of cis-3-hexene with OH radicals using 3-buten-1-ol as reference compound. $[S]_0$ and $[S]_t$ are the concentrations of the cis-3-hexene at times 0 and t, respectively, $[R]_0$ and $[R]_t$ are the concentrations of the reference compound at times 0 and t, respectively..... |            |    |                            | 29 |

A: Cartesian coordinates (angstroms), vibrational frequencies (cm-1) and electronic energies (hartrees) for the stationary points on the cis-3-hexene + OH Potential Energy Surface calculated at BHandHLYP/cc-pVDZ

Reactant a BHandHLYP/cc-pVDZ

#### Cartesian Coordinates

|   |          |          |          |
|---|----------|----------|----------|
| C | 1.499313 | -0.33923 | -0.53763 |
| C | 0.624058 | 0.837341 | -0.23017 |
| C | -0.62408 | 0.837404 | 0.230092 |
| H | 0.954068 | -1.27706 | -0.40576 |
| H | 1.092786 | 1.80694  | -0.39683 |
| H | -1.09285 | 1.807057 | 0.396413 |
| C | -1.49941 | -0.33905 | 0.537828 |
| C | -2.7674  | -0.35756 | -0.31133 |
| H | -3.34278 | 0.56501  | -0.18104 |
| H | -0.95415 | -1.27696 | 0.406438 |
| H | -1.78531 | -0.29558 | 1.596862 |
| H | -3.41489 | -1.19551 | -0.0366  |
| C | 2.767511 | -0.35745 | 0.311238 |
| H | 3.414919 | -1.1955  | 0.036648 |
| H | 3.342857 | 0.565068 | 0.180435 |
| H | 2.526327 | -0.44774 | 1.374695 |
| H | 1.784994 | -0.29619 | -1.59676 |
|   |          |          |          |
| H | -2.52595 | -0.44826 | -1.37469 |

#### Frequencies

53.21 60.39 206.43 213.19 249.24 317.24 371.07 531.90 587.46  
 786.28 806.99 837.37 878.03 942.82 1049.10 1069.94 1081.01 1105.37  
 1128.78 1132.42 1218.03 1311.45 1325.97 1342.52 1371.02 1392.99 1447.88  
 1448.01 1485.31 1509.97 1516.20 1521.67 1521.97 1534.51 1536.26 1817.80  
 3105.42 3106.66 3116.40 3117.00 3164.97 3177.05 3192.31 3196.15 3198.01  
 3199.79 3208.43 3233.72

E(BHandHLYP)..... -235.697484

## Reactant b BHandHLYP/cc-pVDZ

## Cartesian Coordinates

|   |          |          |          |
|---|----------|----------|----------|
| C | 1.593811 | 0.049687 | 0.565285 |
| C | 0.665141 | 0.906925 | -0.23913 |
| C | -0.6651  | 0.906868 | -0.23913 |
| H | 2.18515  | 0.697167 | 1.226193 |
| H | 1.162521 | 1.609037 | -0.90794 |
| H | -1.16254 | 1.608951 | -0.90794 |
| C | -1.59372 | 0.049574 | 0.565301 |
| C | -2.54784 | -0.75566 | -0.31209 |
| H | -3.1373  | -0.09883 | -0.96042 |
| H | -1.03571 | -0.62521 | 1.219198 |
| H | -2.18488 | 0.697002 | 1.226398 |
| H | -3.24681 | -1.33822 | 0.295208 |
| C | 2.547721 | -0.75579 | -0.31212 |
| H | 3.246675 | -1.33838 | 0.295173 |
| H | 1.998132 | -1.44861 | -0.95665 |
| H | 3.137216 | -0.09909 | -0.96055 |
| H | 1.035831 | -0.62492 | 1.21937  |
| H | -1.99839 | -1.44849 | -0.95673 |

## Frequencies

44.92 72.47 206.51 223.09 263.20 299.06 347.36 527.59 610.90 752.88  
824.28 832.62  
882.48 942.33 1058.56 1063.09 1080.78 1105.55  
1130.12 1130.56 1217.00 1313.77 1323.26 1343.86 1369.69 1394.08 1446.77  
1448.19 1486.39 1506.87 1517.31 1521.54 1521.84 1534.21 1534.82 1818.29  
3103.11 3104.85 3116.07 3116.76 3164.49 3176.61 3192.04 3196.13 3197.03  
3199.32 3208.16 3233.45

E(BHandHLYP)..... -235.6974783

PC $\pi$  c BHandHLYP/cc-pVDZ

### Cartesian Coordinates

|   |          |          |          |
|---|----------|----------|----------|
| C | -1.23698 | -1.20069 | -0.31187 |
| C | -0.42042 | -0.70178 | 0.841978 |
| C | 0.764146 | -0.08869 | 0.815203 |
| H | -0.72407 | -1.01961 | -1.25955 |
| H | -0.86876 | -0.87039 | 1.821062 |
| H | 1.201072 | 0.189278 | 1.774325 |
| C | 1.605577 | 0.254642 | -0.37756 |
| C | 2.980993 | -0.40321 | -0.32289 |
| H | 3.518135 | -0.12048 | 0.588333 |
| H | 1.099409 | -0.02404 | -1.30492 |
| H | 1.73324  | 1.344224 | -0.41204 |
| H | 3.593563 | -0.10242 | -1.17741 |
| O | -0.97872 | 2.531048 | -0.06862 |
| H | -0.68665 | 1.720875 | 0.385774 |
| C | -2.63145 | -0.57963 | -0.35137 |
| H | -3.21721 | -0.9869  | -1.18011 |
| H | -3.17913 | -0.78425 | 0.574779 |
| H | -2.57256 | 0.505272 | -0.4725  |
| H | -1.33402 | -2.28998 | -0.21747 |
| H | 2.895548 | -1.49386 | -0.33221 |

### Frequencies

42.54 55.21 64.06 103.96 125.02 208.15 222.04 260.91 313.85 334.47  
376.04 438.55 530.68 589.16 795.25 810.34 840.79 878.47 943.97 1053.13  
1074.21 1080.70 1106.75 1132.40 1138.25 1218.85 1311.21 1327.41 1343.41  
1370.38 1394.85 1448.71 1452.80 1487.21 1511.81 1515.14 1522.09 1528.00  
1535.19 1540.18 1801.34 3108.92 3110.45 3118.91 3120.38 3167.98 3180.31  
3194.77 3199.96 3201.70 3208.93 3213.64 3233.47 3739.45

E(BHandHLYP)..... -311.409810

PC $\pi$  d BHandHLYP/cc-pVDZ

Cartesian Coordinates

|   |          |          |          |
|---|----------|----------|----------|
| C | -1.63123 | -0.03431 | -0.35168 |
| C | -0.69918 | -0.0422  | 0.8225   |
| C | 0.632171 | -0.12384 | 0.819082 |
| H | -2.12029 | 0.947458 | -0.40313 |
| H | -1.19042 | 0.022953 | 1.793156 |
| H | 1.131665 | -0.11691 | 1.787801 |
| C | 1.554747 | -0.22374 | -0.35865 |
| C | 2.536041 | -1.38319 | -0.22848 |
| H | 3.135214 | -1.29319 | 0.683558 |
| H | 0.988797 | -0.31938 | -1.2887  |
| H | 2.114751 | 0.716449 | -0.44086 |
| H | 3.22478  | -1.41079 | -1.07727 |
| O | 0.30287  | 2.943003 | -0.23875 |
| H | 0.152753 | 2.117253 | 0.253932 |
| C | -2.70193 | -1.11544 | -0.24744 |
| H | -3.39578 | -1.06337 | -1.09099 |
| H | -2.25337 | -2.11331 | -0.23732 |
| H | -3.28613 | -1.00521 | 0.672012 |
| H | -1.07921 | -0.14764 | -1.28783 |
| H | 2.010583 | -2.34202 | -0.18631 |

Frequencies

18.35 38.65 54.51 70.43 137.06 201.82 223.33 268.96 289.26 330.08  
 353.33 414.21 519.70 617.83 752.44 827.27 830.98 883.66 944.74 1061.91  
 1068.45 1084.84 1105.70 1132.96 1135.41 1214.95 1313.55 1323.61 1343.74  
 1370.24 1397.08 1448.88 1450.29 1487.38 1504.19 1517.59 1522.51 1522.74  
 1534.01 1534.59 1801.40 3105.71 3114.06 3118.74 3119.39 3166.34 3178.73  
 3195.09 3200.33 3201.08 3201.70 3209.82 3234.10 3746.07

E(BHandHLYP)..... -311.408542

PCπ e BHandHLYP/cc-pVDZ

Cartesian Coordinates

|   |          |          |          |
|---|----------|----------|----------|
| C | 1.596966 | -0.83491 | -0.42288 |
| C | 0.66709  | -0.81227 | 0.75331  |
| C | -0.66717 | -0.81225 | 0.753323 |
| H | 2.061141 | -1.82888 | -0.47386 |
| H | 1.162986 | -0.81679 | 1.724035 |
| H | -1.16306 | -0.81676 | 1.724054 |
| C | -1.59705 | -0.83485 | -0.42287 |
| C | -2.69561 | 0.219689 | -0.3232  |
| H | -3.29003 | 0.081688 | 0.586283 |
| H | -1.04413 | -0.71115 | -1.3576  |
| H | -2.0613  | -1.82879 | -0.47383 |
| H | -3.3763  | 0.157348 | -1.17665 |
| O | 0.000196 | 2.423066 | 0.168744 |
| H | -0.00031 | 1.526348 | 0.549962 |
| C | 2.695602 | 0.219548 | -0.32318 |
| H | 3.37641  | 0.157024 | -1.17654 |
| H | 2.272815 | 1.22757  | -0.29589 |
| H | 3.289889 | 0.081591 | 0.586391 |
| H | 1.044058 | -0.71114 | -1.35762 |
| H | -2.27272 | 1.227664 | -0.29572 |

Frequencies

56.46 72.89 96.28 112.43 119.52 207.51 245.80 278.51 292.98 343.92  
 352.14 458.76 515.06 622.14 741.79 828.50 838.83 885.49 946.37 1061.56  
 1067.23 1079.91 1107.09 1135.02 1139.54 1215.70 1313.73 1321.76 1341.97  
 1365.86 1392.67 1450.59 1456.91 1487.03 1504.43 1516.02 1525.79 1527.93  
 1538.07 1540.68 1799.48 3103.62 3105.11 3119.91 3120.42 3163.47 3176.41  
 3193.82 3197.52 3207.20 3210.35 3211.26 3231.96 3731.15

E(BHandHLYP)..... -311.410766

TSf BHandHLYP/cc-pVDZ

Cartesian Coordinates

|   |          |          |          |
|---|----------|----------|----------|
| C | 1.746083 | 0.014055 | -0.50548 |
| C | 0.815329 | 0.351604 | 0.613435 |
| C | -0.49937 | 0.031836 | 0.698287 |
| H | 1.927085 | 0.924025 | -1.09288 |
| H | 1.237337 | 0.962623 | 1.410659 |
| H | -1.01921 | 0.315162 | 1.610327 |
| C | -1.24183 | -0.92081 | -0.19462 |
| C | -2.75148 | -0.79347 | -0.06449 |
| H | -3.06506 | 0.220345 | -0.31934 |
| H | -0.93622 | -1.94432 | 0.061783 |
| H | -0.9453  | -0.75509 | -1.23264 |
| H | -3.26358 | -1.49732 | -0.72606 |
| O | -1.07931 | 1.772178 | -0.39965 |
| H | -0.67051 | 2.450917 | 0.150813 |
| C | 3.079951 | -0.53634 | -0.01172 |
| H | 3.754315 | -0.74019 | -0.84809 |
| H | 2.942325 | -1.46775 | 0.54602  |
| H | 3.580333 | 0.175968 | 0.652772 |
| H | 1.278896 | -0.69913 | -1.18852 |
| H | -3.07798 | -1.00392 | 0.959888 |

Frequencies

-282.6342 29.74 81.83 108.72 161.32 175.35 206.05 233.01 261.06 305.31  
 369.88 448.40 620.42 727.09 752.21 804.69 831.24 884.36 953.66 998.51  
 1071.16 1085.21 1108.24 1120.64 1131.41 1211.83 1300.93 1319.88 1332.70  
 1365.60 1387.53 1447.48 1449.47 1486.77 1500.26 1510.28 1520.92 1523.29  
 1532.92 1539.88 1678.53 3100.76 3104.86 3117.35 3121.08 3171.78 3180.22  
 3193.35 3198.78 3199.41 3218.17 3228.99 3250.87 3872.37

E(BHandHLYP)..... -311.4046259

TSg BHandHLYP/cc-pVDZ

Cartesian Coordinates

|   |          |          |          |
|---|----------|----------|----------|
| C | -1.29224 | -1.12666 | 0.022554 |
| C | -0.5204  | -0.22797 | 0.933788 |
| C | 0.6427   | 0.413882 | 0.653805 |
| H | -0.68605 | -1.41121 | -0.84054 |
| H | -0.99618 | -0.00658 | 1.88868  |
| H | 1.079867 | 1.008713 | 1.451738 |
| C | 1.554805 | 0.143201 | -0.50432 |
| C | 2.644516 | -0.86494 | -0.15351 |
| H | 3.237272 | -0.5287  | 0.703717 |
| H | 0.980692 | -0.20599 | -1.36507 |
| H | 2.00779  | 1.091227 | -0.80417 |
| H | 3.329155 | -1.00644 | -0.99496 |
| O | -0.31762 | 2.056685 | -0.29217 |
| H | -0.97707 | 2.282078 | 0.375254 |
| C | -2.59094 | -0.4787  | -0.45557 |
| H | -3.14667 | -1.15007 | -1.11665 |
| H | -3.24167 | -0.23041 | 0.39007  |
| H | -2.36795 | 0.445915 | -0.99282 |
| H | -1.52701 | -2.05528 | 0.558383 |
| H | 2.218123 | -1.83955 | 0.103226 |

Frequencies

-280.9368 55.45 67.68 121.91 175.20 211.57 226.88 236.50 266.22 322.61  
 393.93 502.71 582.22 733.53 792.24 814.87 839.52 875.09 941.53 1007.75  
 1049.06 1081.40 1106.81 1121.13 1128.93 1219.76 1299.40 1323.01 1331.78  
 1368.74 1384.23 1439.83 1447.03 1483.77 1510.61 1519.83 1521.01 1523.63  
 1539.88 1542.93 1675.60 3109.10 3115.40 3117.70 3156.89 3175.27 3181.54  
 3192.95 3196.48 3208.13 3218.05 3221.31 3255.69 3870.48

E(BHandHLYP)..... -311.4058426



TSh BHandHLYP/cc-pVDZ

Cartesian Coordinates

|   |          |          |          |
|---|----------|----------|----------|
| C | -1.59569 | 0.145889 | -0.47655 |
| C | -0.63905 | 0.472232 | 0.624052 |
| C | 0.709579 | 0.321783 | 0.611768 |
| H | -2.00093 | 1.084802 | -0.87648 |
| H | -1.08285 | 0.930624 | 1.50757  |
| H | 1.23857  | 0.57029  | 1.528146 |
| C | 1.517053 | -0.44002 | -0.39536 |
| C | 1.76835  | -1.8796  | 0.042252 |
| H | 2.268817 | -1.91802 | 1.015553 |
| H | 1.024781 | -0.42151 | -1.36971 |
| H | 2.469135 | 0.080056 | -0.52512 |
| H | 2.405417 | -2.4001  | -0.67889 |
| O | 1.067292 | 2.20178  | -0.30175 |
| H | 0.48528  | 2.768667 | 0.218806 |
| C | -2.75171 | -0.7308  | -0.00416 |
| H | -3.45944 | -0.91844 | -0.81656 |
| H | -2.39132 | -1.69744 | 0.360785 |
| H | -3.30237 | -0.25365 | 0.813358 |
| H | -1.07669 | -0.33732 | -1.30705 |
| H | 0.832041 | -2.43912 | 0.131614 |

Frequencies

-284.5523 38.67 60.76 91.19 165.20 189.57 210.70 224.07 253.70 312.93  
 365.39 510.58 588.36 733.69 768.21 815.75 834.36 877.77 941.69 1008.81  
 1056.99 1081.85 1106.98 1120.22 1125.88 1219.15 1301.35 1320.50 1326.84  
 1368.31 1383.10 1447.25 1449.86 1485.95 1507.70 1520.20 1521.34 1522.72  
 1533.91 1539.22 1677.55 3104.23 3115.31 3117.13 3158.12 3177.14 3182.10  
 3195.20 3197.62 3198.40 3210.11 3216.65 3256.45 3868.60

E(BHandHLYP)..... -311.4041443

TSi BHandHLYP/cc-pVDZ

Cartesian Coordinates

|   |          |          |          |
|---|----------|----------|----------|
| C | -1.42002 | -0.75674 | -0.32821 |
| C | -0.57442 | -0.22196 | 0.791288 |
| C | 0.767803 | -0.36838 | 0.925563 |
| H | -0.90193 | -0.61564 | -1.27946 |
| H | -1.12469 | 0.111916 | 1.667865 |
| H | 1.218275 | -0.03426 | 1.859441 |
| C | 1.721248 | -0.85118 | -0.11812 |
| C | 2.674198 | 0.250853 | -0.57811 |
| H | 2.103617 | 1.086243 | -0.99015 |
| H | 2.304382 | -1.68489 | 0.294613 |
| H | 1.17703  | -1.24978 | -0.97731 |
| H | 3.366394 | -0.11881 | -1.3402  |
| O | -0.35258 | 1.720975 | -0.06979 |
| H | 0.138536 | 2.152955 | 0.639478 |
| C | -2.79608 | -0.11234 | -0.38932 |
| H | -3.3866  | -0.52614 | -1.21114 |
| H | -3.3531  | -0.28455 | 0.538196 |
| H | -2.70018 | 0.965198 | -0.53249 |
| H | -1.529   | -1.8407  | -0.18777 |
| H | 3.271584 | 0.629089 | 0.258691 |

Frequencies

-283.62 63.32 90.53 122.54 176.92 215.08 225.36 240.37 285.42 295.64  
 360.57 474.07 614.84 731.82 750.66 826.09 829.37 885.38 952.54 1000.93  
 1059.51 1085.85 1107.94 1123.20 1132.46 1215.45 1300.59 1328.10 1333.55  
 1368.96 1385.83 1440.62 1447.70 1487.30 1500.34 1514.20 1520.24 1522.27  
 1538.95 1542.74 1676.70 3101.39 3105.49 3117.95 3121.64 3173.51 3180.17  
 3192.52 3197.89 3218.84 3221.74 3230.55 3250.31 3873.71

E(BHandHLYP)..... -311.4063144

## PRODj BHandHLYP/cc-pVDZ

## Cartesian Coordinates

|   |          |          |          |
|---|----------|----------|----------|
| C | 1.772495 | -0.30147 | -0.44012 |
| C | 0.853403 | -0.10317 | 0.715276 |
| C | -0.58213 | 0.270642 | 0.528126 |
| H | 1.445912 | 0.336002 | -1.26775 |
| H | 1.152414 | -0.49161 | 1.686818 |
| H | -0.9909  | 0.585026 | 1.50138  |
| C | -1.43838 | -0.88787 | 0.019828 |
| C | -2.9106  | -0.52902 | -0.10213 |
| H | -3.04332 | 0.317737 | -0.77832 |
| H | -1.30791 | -1.73638 | 0.700384 |
| H | -1.04615 | -1.19827 | -0.95516 |
| H | -3.4909  | -1.37309 | -0.48558 |
| O | -0.73242 | 1.319358 | -0.41372 |
| H | -0.23016 | 2.070461 | -0.10103 |
| C | 3.234935 | -0.03327 | -0.10587 |
| H | 3.878669 | -0.21788 | -0.97058 |
| H | 3.578668 | -0.67913 | 0.70891  |
| H | 3.384349 | 1.003635 | 0.21074  |
| H | 1.681158 | -1.33699 | -0.81058 |
| H | -3.33021 | -0.25021 | 0.870672 |

## Frequencies

46.89 67.83 109.73 209.15 236.84 257.45 269.39 319.12 342.48 371.79  
474.97 541.52 684.96 795.96 816.63 858.00 932.85 1013.70 1053.49 1079.84  
1092.29 1102.97 1125.28 1186.86 1209.55 1293.26 1309.66 1347.17 1360.58  
1365.17 1425.64 1443.51 1449.44 1452.34 1473.71 1505.59 1508.54 1519.33  
1522.04 1530.09 1534.95 3034.04 3053.26 3115.97 3118.22 3123.72 3157.02  
3163.34 3189.25 3190.55 3195.53 3221.68 3237.38 3956.60

E(BHandHLYP)..... -311.451903

## PRODI BHandHLYP/cc-pVDZ

## Cartesian Coordinates

|   |          |          |          |
|---|----------|----------|----------|
| C | -1.43302 | -0.63386 | -0.40381 |
| C | -0.51015 | -0.03868 | 0.602892 |
| C | 0.634011 | 0.83577  | 0.1981   |
| H | -1.47566 | 0.022704 | -1.27874 |
| H | -0.5332  | -0.42511 | 1.619159 |
| H | 1.060959 | 1.2929   | 1.104088 |
| C | 1.757011 | 0.090871 | -0.52045 |
| C | 2.450604 | -0.95065 | 0.340353 |
| H | 2.879085 | -0.50127 | 1.242908 |
| H | 1.341203 | -0.37147 | -1.42242 |
| H | 2.475531 | 0.843429 | -0.86124 |
| H | 3.266621 | -1.42938 | -0.20769 |
| O | 0.217999 | 1.850143 | -0.7011  |
| H | -0.50089 | 2.329257 | -0.29104 |
| C | -2.83462 | -0.89278 | 0.135414 |
| H | -3.47159 | -1.35504 | -0.62399 |
| H | -2.80732 | -1.56372 | 1.000421 |
| H | -3.31302 | 0.037978 | 0.455702 |
| H | -1.01564 | -1.58789 | -0.76925 |
| H | 1.759823 | -1.73742 | 0.659298 |

## Frequencies

47.54 69.59 114.90 207.73 226.36 250.76 265.04 338.08 369.98 372.07  
458.47 540.52 654.67 794.42 823.58 860.66 930.59 1021.52 1069.79 1081.34  
1095.29 1101.85 1127.46 1171.66 1213.42 1293.29 1312.07 1323.46 1349.93  
1387.14 1429.35 1440.12 1449.48 1456.84 1474.14 1506.92 1519.94 1522.38  
1523.27 1530.17 1534.71 3034.00 3058.93 3116.13 3116.45 3128.44 3155.37  
3165.24 3190.63 3190.76 3196.10 3198.00 3244.34 3952.05

E(BHandHLYP)..... -311.450951

## PRODm BHandHLYP/cc-pVDZ

## Cartesian Coordinates

|   |          |          |          |
|---|----------|----------|----------|
| C | 1.707428 | -0.59915 | -0.19894 |
| C | 0.541142 | -0.51016 | 0.726367 |
| C | -0.86978 | -0.62584 | 0.24407  |
| H | 2.367085 | -1.42083 | 0.117926 |
| H | 0.717357 | -0.21821 | 1.758679 |
| H | -1.52142 | -0.81101 | 1.112271 |
| C | -1.38759 | 0.625403 | -0.46316 |
| C | -1.49885 | 1.840849 | 0.440756 |
| H | -2.16196 | 1.645731 | 1.290673 |
| H | -0.731   | 0.837975 | -1.31435 |
| H | -2.36698 | 0.373277 | -0.8831  |
| H | -1.90638 | 2.696492 | -0.10448 |
| O | -1.01232 | -1.67599 | -0.6972  |
| H | -0.67349 | -2.47681 | -0.29936 |
| C | 2.540869 | 0.681679 | -0.25712 |
| H | 3.403516 | 0.558282 | -0.9191  |
| H | 1.948575 | 1.523523 | -0.62844 |
| H | 2.917011 | 0.95287  | 0.734701 |
| H | 1.351729 | -0.86603 | -1.19831 |
| H | -0.52501 | 2.137331 | 0.842359 |

## Frequencies

39.88 63.19 117.28 213.62 228.51 256.96 282.00 325.75 367.35 373.35  
464.56 542.89 648.98 774.47 832.49 862.19 924.95 1009.47 1060.74 1080.53  
1089.88 1102.11 1129.41 1174.55 1211.43 1292.41 1314.69 1323.94 1352.87  
1384.64 1429.64 1436.46 1443.50 1456.70 1470.66 1511.63 1518.14 1522.84  
1523.94 1531.62 1535.47 3055.18 3071.00 3115.33 3116.82 3125.32 3163.58  
3167.28 3190.45 3192.22 3196.50 3198.81 3247.64 3953.13

E(BHandHLYP)..... -311.450265

## PRODn BHandHLYP/cc-pVDZ

## Cartesian Coordinates

|   |          |          |          |
|---|----------|----------|----------|
| C | -1.48982 | -0.83638 | 0.059615 |
| C | -0.65953 | 0.410874 | 0.357347 |
| C | 0.775863 | 0.102386 | 0.640137 |
| H | -1.07192 | -1.31822 | -0.83143 |
| H | -1.09403 | 0.896152 | 1.245524 |
| H | 1.05773  | -0.0909  | 1.67326  |
| C | 1.723052 | -0.29508 | -0.43871 |
| C | 3.174259 | 0.05458  | -0.13198 |
| H | 3.304097 | 1.134802 | -0.01361 |
| H | 1.652525 | -1.38314 | -0.60914 |
| H | 1.407601 | 0.169933 | -1.37799 |
| H | 3.839507 | -0.27916 | -0.93339 |
| O | -0.80132 | 1.260944 | -0.76815 |
| H | -0.31533 | 2.06548  | -0.59282 |
| C | -2.96321 | -0.5309  | -0.15697 |
| H | -3.52425 | -1.44131 | -0.38635 |
| H | -3.40814 | -0.08129 | 0.737467 |
| H | -3.09095 | 0.171538 | -0.98288 |
| H | -1.36433 | -1.53944 | 0.890338 |
| H | 3.507205 | -0.42079 | 0.796634 |

## Frequencies

46.84 67.88 109.72 209.16 236.84 257.45 269.40 319.14 342.46 371.72  
474.97 541.31 684.97 795.96 816.62 858.01 932.86 1013.69 1053.50 1079.83  
1092.30 1102.98 1125.28 1186.85 1209.51 1293.26 1309.65 1347.15 1360.58  
1365.18 1425.63 1443.50 1449.45 1452.34 1473.68 1505.59 1508.54 1519.33  
1522.05 1530.10 1534.96 3033.99 3053.29 3115.96 3118.22 3123.73 3157.07  
3163.35 3189.27 3190.53 3195.53 3221.67 3237.57 3956.58

E(BHandHLYP)..... -311.451903

B: Cartesian coordinates (angstroms), vibrational frequencies (cm-1) and electronic energies (hartrees) for the stationary points on the cis-3-hexene + OH Potential Energy Surface calculated at BHandHLYP/aug-cc-pVDZ.

Reactant a BHandHLYP/aug-cc-pVDZ

Cartesian Coordinates

|   |          |          |          |
|---|----------|----------|----------|
| C | -1.59879 | -0.24678 | 0.200982 |
| C | -0.64856 | 0.58114  | -0.60918 |
| C | 0.681889 | 0.576034 | -0.57704 |
| H | -1.06076 | -0.8802  | 0.905958 |
| H | -1.1244  | 1.256069 | -1.3167  |
| H | 1.196377 | 1.252945 | -1.255   |
| C | 1.585098 | -0.23938 | 0.297049 |
| C | 2.489995 | 0.631934 | 1.165457 |
| H | 3.096132 | 1.300894 | 0.550805 |
| H | 1.009699 | -0.91347 | 0.931254 |
| H | 2.212648 | -0.87154 | -0.33962 |
| H | 3.168048 | 0.018942 | 1.761789 |
| C | -2.50405 | -1.11046 | -0.67462 |
| H | -3.21572 | -1.67213 | -0.06702 |
| H | -3.07347 | -0.49561 | -1.37493 |
| H | -1.91742 | -1.82213 | -1.25794 |
| H | -2.22484 | 0.42272  | 0.799837 |
| H | 1.900223 | 1.248565 | 1.84575  |

Frequencies

47.11 49.12 201.60 210.31 241.69 308.81 370.81 526.21 586.83 773.54  
 798.15 831.32 875.57 941.33 1039.12 1064.14 1076.63 1104.55 1126.17  
 1129.10 1215.96 1311.46 1322.71 1342.75 1366.18 1386.66 1443.74 1443.96  
 1486.35 1512.27 1516.58 1523.16 1523.72 1533.64 1535.54 1802.81 3105.36  
 3106.52 3114.93 3115.44 3164.96 3175.78 3188.58 3192.03 3193.36 3197.56  
 3210.10 3234.18

E(BHandHLYP)..... -235.709965

Reactant b BHandHLYP/aug-cc-pVDZ

Cartesian Coordinates

|   |          |          |          |
|---|----------|----------|----------|
| C | -1.35288 | -0.34796 | -0.95119 |
| C | -0.47184 | 0.821893 | -0.63568 |
| C | 0.780634 | 0.812052 | -0.18584 |
| H | -1.57145 | -0.34363 | -2.02421 |
| H | -0.93314 | 1.793485 | -0.79613 |
| H | 1.252069 | 1.776312 | -0.01124 |
| C | 1.644696 | -0.37148 | 0.125515 |
| C | 2.170956 | -0.34296 | 1.558542 |
| H | 2.73817  | 0.570618 | 1.749199 |
| H | 1.107014 | -1.30336 | -0.04863 |
| H | 2.4974   | -0.37407 | -0.56153 |
| H | 2.829563 | -1.19173 | 1.750559 |
| C | -2.67162 | -0.3032  | -0.18294 |
| H | -3.31335 | -1.14204 | -0.45782 |
| H | -2.49739 | -0.34636 | 0.893538 |
| H | -3.21707 | 0.618912 | -0.39485 |
| H | -0.84115 | -1.28802 | -0.74565 |
| H | 1.349687 | -0.38013 | 2.276288 |

Frequencies

40.40 59.37 202.65 221.64 260.44 291.18 346.38 521.97 611.35 737.42  
819.54 823.83 879.80 940.59 1045.95 1059.01 1076.33 1104.41 1127.18  
1127.70 1214.76 1313.72 1319.63 1343.26 1364.94 1389.40 1443.23 1444.67  
1487.30 1508.10 1519.03 1523.62 1523.71 1533.12 1534.76 1802.84 3103.26  
3105.02 3114.65 3115.30 3164.48 3175.07 3188.34 3191.95 3192.42 3196.79  
3210.57 3234.43

E(BHandHLYP)..... -235.709996



PC $\pi$ c BHandHLYP/aug-cc-pVDZ

Cartesian Coordinates

|   |          |          |          |
|---|----------|----------|----------|
| C | -1.23035 | -1.21599 | -0.3629  |
| C | -0.43274 | -0.65814 | 0.77676  |
| C | 0.758885 | -0.05951 | 0.738065 |
| H | -0.73837 | -1.01967 | -1.31495 |
| H | -0.89571 | -0.77329 | 1.754151 |
| H | 1.181082 | 0.263849 | 1.686562 |
| C | 1.625407 | 0.204999 | -0.45605 |
| C | 2.990791 | -0.46815 | -0.33258 |
| H | 3.51036  | -0.13702 | 0.568862 |
| H | 1.136935 | -0.1235  | -1.3728  |
| H | 1.775243 | 1.28533  | -0.55105 |
| H | 3.621094 | -0.22766 | -1.1899  |
| O | -0.97446 | 2.69945  | 0.238244 |
| H | -0.67485 | 1.809352 | 0.48606  |
| C | -2.6568  | -0.67177 | -0.39948 |
| H | -3.22687 | -1.13499 | -1.20601 |
| H | -3.1777  | -0.877   | 0.538119 |
| H | -2.66256 | 0.40775  | -0.55699 |
| H | -1.27141 | -2.30442 | -0.25194 |
| H | 2.887289 | -1.55301 | -0.27896 |

Frequencies

36.11 44.70 49.63 59.03 119.91 197.55 215.50 244.12 302.87 327.91  
 372.99 434.86 524.05 589.18 780.13 800.52 835.62 876.02 942.09 1045.48  
 1070.10 1075.82 1105.43 1128.90 1132.18 1215.89 1312.49 1323.76 1344.21  
 1367.38 1390.64 1444.37 1449.01 1489.05 1511.89 1516.20 1524.22 1527.62  
 1534.65 1534.97 1790.34 3106.82 3107.73 3117.31 3117.74 3169.07 3179.36  
 3192.02 3196.27 3198.00 3201.09 3211.32 3234.50 3744.84

E(BHandHLYP)..... -311.432899

PC $\pi$ d BHandHLYP/aug-cc-pVDZ

Cartesian Coordinates

|   |          |          |          |
|---|----------|----------|----------|
| C | -1.37162 | -0.85688 | -0.40818 |
| C | -0.56887 | -0.32805 | 0.741512 |
| C | 0.632368 | 0.251733 | 0.713394 |
| H | -2.30061 | -0.28261 | -0.48117 |
| H | -1.03355 | -0.45502 | 1.716435 |
| H | 1.057254 | 0.554675 | 1.66746  |
| C | 1.501395 | 0.530066 | -0.47543 |
| C | 2.884957 | -0.09994 | -0.33402 |
| H | 3.388239 | 0.258236 | 0.566385 |
| H | 1.029744 | 0.179845 | -1.39307 |
| H | 1.6168   | 1.613545 | -0.58017 |
| H | 3.51405  | 0.148306 | -1.19    |
| O | -1.3754  | 2.875173 | 0.178179 |
| H | -0.9669  | 2.030297 | 0.429    |
| C | -1.71913 | -2.33339 | -0.23368 |
| H | -2.33747 | -2.68709 | -1.05991 |
| H | -0.81656 | -2.94551 | -0.19737 |
| H | -2.2723  | -2.49871 | 0.693142 |
| H | -0.84451 | -0.71178 | -1.35067 |
| H | 2.814411 | -1.18676 | -0.26705 |

Frequencies

30.33 34.88 39.64 56.41 120.20 202.69 220.11 261.29 291.25 330.42  
 355.93 421.63 524.77 612.32 749.97 824.76 826.78 879.65 941.20 1054.63  
 1059.94 1079.17 1105.22 1129.21 1130.54 1214.73 1315.43 1322.59 1344.49  
 1367.62 1391.10 1444.30 1446.18 1488.90 1508.02 1519.80 1524.96 1525.17  
 1533.75 1535.79 1790.52 3107.66 3111.71 3116.96 3117.56 3168.11 3178.51  
 3192.05 3195.72 3196.12 3199.91 3211.90 3235.27 3743.39

E(BHandHLYP)..... -311.432928

PCπe BHandHLYP/aug-cc-pVDZ

Cartesian Coordinates

|   |          |          |          |
|---|----------|----------|----------|
| C | 1.594798 | -0.89724 | -0.42157 |
| C | 0.666862 | -0.8162  | 0.752534 |
| C | -0.66712 | -0.81628 | 0.75258  |
| H | 2.138033 | -1.84602 | -0.36473 |
| H | 1.161259 | -0.76293 | 1.719983 |
| H | -1.16146 | -0.76311 | 1.720064 |
| C | -1.59511 | -0.89738 | -0.42147 |
| C | -2.60611 | 0.246755 | -0.44737 |
| H | -3.187   | 0.278182 | 0.476692 |
| H | -1.03763 | -0.91659 | -1.35727 |
| H | -2.13835 | -1.84615 | -0.36463 |
| H | -3.30464 | 0.128068 | -1.27678 |
| O | 0.001719 | 2.517017 | 0.836491 |
| H | 0.000294 | 1.546679 | 0.874628 |
| C | 2.605828 | 0.246868 | -0.44748 |
| H | 3.304038 | 0.1284   | -1.27719 |
| H | 2.107915 | 1.211162 | -0.56345 |
| H | 3.187052 | 0.277997 | 0.476378 |
| H | 1.037298 | -0.91646 | -1.35735 |
| H | -2.10819 | 1.210985 | -0.5638  |

Frequencies

23.23 25.57 50.95 57.34 111.68 203.32 230.30 260.74 292.43 335.05  
 349.23 440.91 522.84 613.49 741.60 822.17 825.86 880.86 940.49 1055.32  
 1060.45 1074.65 1104.82 1128.89 1130.73 1214.05 1312.82 1318.44 1343.15  
 1362.92 1387.79 1442.76 1448.30 1488.75 1509.09 1519.21 1519.88 1527.46  
 1535.10 1536.89 1791.21 3107.32 3108.93 3115.59 3116.44 3167.70 3178.50  
 3188.74 3193.71 3195.20 3199.82 3208.86 3232.35 3749.15

E(BHandHLYP)..... -311.432907

TSf BHandHLYP/aug-cc-pVDZ

Cartesian Coordinates

|   |          |          |          |
|---|----------|----------|----------|
| C | 1.743855 | -0.00333 | -0.51178 |
| C | 0.807559 | 0.346075 | 0.599322 |
| C | -0.49562 | 0.003826 | 0.696513 |
| H | 1.928854 | 0.894991 | -1.10978 |
| H | 1.226501 | 0.956237 | 1.395447 |
| H | -1.02073 | 0.298469 | 1.598268 |
| C | -1.23943 | -0.92355 | -0.22056 |
| C | -2.74936 | -0.83574 | -0.05305 |
| H | -3.09898 | 0.171891 | -0.27399 |
| H | -0.91046 | -1.9482  | -0.01711 |
| H | -0.97111 | -0.70686 | -1.25381 |
| H | -3.25421 | -1.53283 | -0.72312 |
| O | -1.0848  | 1.866033 | -0.37393 |
| H | -0.5829  | 2.518606 | 0.121078 |
| C | 3.077062 | -0.54224 | 0.00124  |
| H | 3.751334 | -0.76093 | -0.82791 |
| H | 2.935843 | -1.46035 | 0.574097 |
| H | 3.570399 | 0.18391  | 0.650856 |
| H | 1.284793 | -0.72966 | -1.18169 |
| H | -3.04531 | -1.08387 | 0.968946 |

Frequencies

-167.41 31.53 72.43 73.44 149.66 169.45 184.59 223.22 252.84 300.92  
 364.66 455.76 620.42 665.04 744.36 803.25 832.69 882.31 952.06 1008.47  
 1068.90 1084.39 1108.49 1120.30 1132.15 1209.59 1305.92 1321.93 1331.73  
 1364.53 1385.70 1445.67 1447.59 1490.93 1506.75 1514.37 1525.27 1526.29  
 1533.64 1538.29 1692.34 3101.48 3107.58 3116.41 3118.65 3168.81 3176.74  
 3189.12 3195.18 3196.66 3215.46 3222.30 3260.24 3919.91

E(BHandHLYP)..... -311.43053

TSg BHandHLYP/aug-cc-pVDZ

Cartesian Coordinates

|   |          |          |          |
|---|----------|----------|----------|
| C | -1.30113 | -1.08221 | -0.03377 |
| C | -0.53815 | -0.17332 | 0.873951 |
| C | 0.66607  | 0.396999 | 0.643027 |
| H | -0.74366 | -1.26579 | -0.95116 |
| H | -1.03324 | 0.071692 | 1.810428 |
| H | 1.090945 | 0.991191 | 1.443941 |
| C | 1.594922 | 0.102861 | -0.49395 |
| C | 2.645408 | -0.93908 | -0.1137  |
| H | 3.222203 | -0.6186  | 0.756529 |
| H | 1.035139 | -0.23209 | -1.36605 |
| H | 2.086725 | 1.032589 | -0.77998 |
| H | 3.343987 | -1.09918 | -0.93654 |
| O | -0.24764 | 2.163783 | -0.31492 |
| H | -0.94264 | 2.377845 | 0.312972 |
| C | -2.68816 | -0.54015 | -0.37341 |
| H | -3.239   | -1.24757 | -0.99509 |
| H | -3.27358 | -0.36589 | 0.53219  |
| H | -2.60833 | 0.403211 | -0.91403 |
| H | -1.41282 | -2.05181 | 0.463774 |
| H | 2.181579 | -1.89653 | 0.129511 |

Frequencies

-171.16 44.79 52.34 84.83 154.86 185.75 213.66 219.21 247.35 311.79  
 392.18 501.41 585.62 669.62 776.06 813.24 832.00 874.01 940.94 1014.00  
 1051.83 1077.23 1106.62 1118.13 1125.96 1217.76 1302.16 1321.09 1330.54  
 1367.54 1382.28 1440.19 1441.44 1488.04 1510.48 1520.94 1523.87 1524.79  
 1536.22 1542.41 1690.69 3099.49 3114.57 3116.74 3154.16 3175.35 3178.87  
 3191.14 3193.91 3204.19 3206.82 3220.16 3262.14 3917.62

E(BHandHLYP)..... -311.4309709

TSh BHandHLYP/aug-cc-pVDZ

Cartesian Coordinates

|   |          |          |          |
|---|----------|----------|----------|
| C | -1.5988  | 0.124856 | -0.49106 |
| C | -0.63976 | 0.473038 | 0.600627 |
| C | 0.701102 | 0.293535 | 0.606519 |
| H | -1.99753 | 1.051671 | -0.91602 |
| H | -1.0813  | 0.94562  | 1.474621 |
| H | 1.228189 | 0.556874 | 1.516379 |
| C | 1.511844 | -0.45946 | -0.40241 |
| C | 1.787506 | -1.89279 | 0.048177 |
| H | 2.293375 | -1.91138 | 1.015867 |
| H | 1.012671 | -0.45977 | -1.37015 |
| H | 2.454881 | 0.069011 | -0.54145 |
| H | 2.42604  | -2.40655 | -0.67221 |
| O | 1.075158 | 2.268622 | -0.28074 |
| H | 0.468201 | 2.821503 | 0.218082 |
| C | -2.76176 | -0.7275  | 0.013171 |
| H | -3.46619 | -0.9369  | -0.79308 |
| H | -2.40678 | -1.68016 | 0.409674 |
| H | -3.30708 | -0.21716 | 0.809887 |
| H | -1.0876  | -0.39063 | -1.30275 |
| H | 0.861079 | -2.46121 | 0.146949 |

Frequencies

-186.96 35.56 58.29 81.46 151.58 182.99 206.06 216.30 248.05 306.70  
 365.50 519.11 589.08 675.89 762.83 816.02 830.54 876.10 939.95 1015.39  
 1052.29 1076.25 1106.42 1119.83 1123.96 1218.70 1304.41 1319.37 1329.59  
 1367.53 1382.04 1441.70 1445.73 1488.78 1510.80 1521.68 1524.01 1525.06  
 1534.54 1542.12 1687.86 3107.89 3114.69 3116.40 3155.99 3175.20 3179.35  
 3191.97 3195.12 3195.69 3208.38 3220.33 3262.57 3918.96

E(BHandHLYP)..... -311.4305934

TSi BHandHLYP/aug-cc-pVDZ

Cartesian Coordinates

|   |          |          |          |
|---|----------|----------|----------|
| C | -1.6886  | -0.82696 | -0.13612 |
| C | -0.75304 | -0.25617 | 0.878543 |
| C | 0.592756 | -0.16941 | 0.783001 |
| H | -1.14871 | -1.0864  | -1.04602 |
| H | -1.21807 | 0.146459 | 1.774759 |
| H | 1.125272 | 0.231669 | 1.638381 |
| C | 1.448493 | -0.77754 | -0.28893 |
| C | 2.85371  | -0.19493 | -0.33032 |
| H | 2.816939 | 0.874588 | -0.53219 |
| H | 1.507985 | -1.85622 | -0.10881 |
| H | 0.967077 | -0.64984 | -1.25799 |
| H | 3.448414 | -0.67539 | -1.10835 |
| O | 0.386496 | 1.802589 | -0.20556 |
| H | -0.14555 | 2.266246 | 0.445983 |
| C | -2.8395  | 0.118657 | -0.46956 |
| H | -3.52768 | -0.34296 | -1.17918 |
| H | -3.40798 | 0.376257 | 0.42694  |
| H | -2.46046 | 1.04143  | -0.90949 |
| H | -2.10053 | -1.76256 | 0.259218 |
| H | 3.368366 | -0.34591 | 0.621509 |

Frequencies

-174.64 43.71 71.96 80.64 143.51 188.72 196.68 228.85 274.65 291.24  
352.64 457.22 626.32 676.79 727.97 808.97 830.69 885.07 952.34 1007.42  
1068.13 1084.69 1107.60 1120.75 1130.54 1210.53 1305.38 1323.70 1333.73  
1365.74 1384.63 1441.34 1447.07 1491.78 1503.98 1509.90 1524.36 1526.11  
1535.07 1538.14 1691.01 3093.93 3101.93 3116.60 3119.06 3169.72 3177.19  
3188.59 3194.69 3204.41 3216.71 3222.52 3258.45 3920.83

E(BHandHLYP)..... -311.430996

PRODj BHandHLYP/aug-cc-pVDZ

Cartesian Coordinates

|   |          |          |          |
|---|----------|----------|----------|
| C | 1.755273 | -0.31253 | -0.41876 |
| C | 0.847466 | -0.02046 | 0.725303 |
| C | -0.59683 | 0.308954 | 0.530184 |
| H | 1.46507  | 0.297674 | -1.27666 |
| H | 1.172782 | -0.29084 | 1.724639 |
| H | -1.02511 | 0.589683 | 1.499816 |
| C | -1.4053  | -0.86261 | -0.02101 |
| C | -2.89418 | -0.5687  | -0.12333 |
| H | -3.07902 | 0.273601 | -0.7885  |
| H | -1.23704 | -1.72411 | 0.629734 |
| H | -1.00558 | -1.12079 | -1.00403 |
| H | -3.43333 | -1.43548 | -0.5091  |
| O | -0.7721  | 1.387997 | -0.38426 |
| H | -0.26457 | 2.134043 | -0.07826 |
| C | 3.228002 | -0.09456 | -0.09171 |
| H | 3.859912 | -0.34712 | -0.94451 |
| H | 3.53891  | -0.71634 | 0.750661 |
| H | 3.42005  | 0.946421 | 0.174308 |
| H | 1.617144 | -1.35593 | -0.73923 |
| H | -3.31259 | -0.32441 | 0.85603  |

Frequencies

47.18 71.09 106.33 193.71 229.04 247.38 267.33 320.35 325.16 345.71  
 470.77 523.31 684.34 790.64 808.95 854.19 932.70 1006.52 1053.29 1081.92  
 1091.08 1099.03 1126.16 1176.27 1209.75 1292.19 1308.87 1348.85 1358.36  
 1364.59 1419.87 1441.62 1447.06 1453.53 1471.58 1507.71 1512.62 1523.54  
 1525.47 1530.77 1534.12 3036.71 3079.39 3114.74 3116.68 3125.08 3148.52  
 3165.12 3184.38 3185.41 3191.29 3213.59 3244.65 3990.61

E(BHandHLYP)..... -311.475424



PRODI BHandHLYP/aug-cc-pVDZ

Cartesian Coordinates

|   |          |          |          |
|---|----------|----------|----------|
| C | -1.39273 | -0.62603 | -0.40846 |
| C | -0.52824 | 0.02721  | 0.613122 |
| C | 0.646385 | 0.870198 | 0.234075 |
| H | -1.458   | 0.014613 | -1.29065 |
| H | -0.62746 | -0.28068 | 1.648322 |
| H | 1.087874 | 1.284656 | 1.14766  |
| C | 1.736111 | 0.109098 | -0.51557 |
| C | 2.376466 | -0.99626 | 0.309584 |
| H | 2.81376  | -0.60028 | 1.229055 |
| H | 1.305224 | -0.29922 | -1.43201 |
| H | 2.490302 | 0.837023 | -0.82051 |
| H | 3.173801 | -1.4844  | -0.25199 |
| O | 0.264137 | 1.942153 | -0.62571 |
| H | -0.44703 | 2.425801 | -0.21529 |
| C | -2.78856 | -0.95865 | 0.105434 |
| H | -3.37878 | -1.46204 | -0.66168 |
| H | -2.73912 | -1.61703 | 0.975429 |
| H | -3.32215 | -0.054   | 0.402326 |
| H | -0.91477 | -1.55467 | -0.75444 |
| H | 1.650531 | -1.7617  | 0.589903 |

Frequencies

49.60 68.17 117.86 194.37 228.24 245.62 250.30 320.77 342.94 363.82  
454.48 529.92 649.67 793.41 817.97 855.42 929.75 1022.07 1061.24 1077.25  
1091.84 1096.46 1124.56 1162.94 1213.76 1292.83 1309.81 1320.75 1350.40  
1382.59 1425.49 1439.62 1446.97 1453.23 1473.41 1507.69 1523.68 1525.04  
1527.53 1530.90 1538.20 3036.48 3084.87 3115.04 3115.44 3131.73 3146.93  
3166.36 3185.63 3188.88 3191.85 3194.17 3250.38 3987.90

E(BHandHLYP)..... -311.475097

## PRODm BHandHLYP/aug-cc-pVDZ

## Cartesian Coordinates

|   |          |          |          |
|---|----------|----------|----------|
| C | 1.571688 | 0.117054 | -0.46144 |
| C | 0.601617 | -0.01815 | 0.660358 |
| C | -0.78646 | -0.53066 | 0.449152 |
| H | 1.401958 | -0.68306 | -1.18529 |
| H | 0.83642  | 0.455341 | 1.607436 |
| H | -1.28721 | -0.59334 | 1.422123 |
| C | -1.63618 | 0.347317 | -0.46515 |
| C | -1.88066 | 1.740594 | 0.09315  |
| H | -2.37148 | 1.695187 | 1.068088 |
| H | -1.1476  | 0.406727 | -1.43984 |
| H | -2.58565 | -0.16838 | -0.62089 |
| H | -2.52339 | 2.316282 | -0.57385 |
| O | -0.77985 | -1.82278 | -0.15479 |
| H | -0.22453 | -2.39986 | 0.361689 |
| C | 3.026048 | 0.114938 | -0.00542 |
| H | 3.702112 | 0.245963 | -0.8516  |
| H | 3.215699 | 0.92429  | 0.702955 |
| H | 3.280333 | -0.82521 | 0.487288 |
| H | 1.375216 | 1.052638 | -1.00603 |
| H | -0.94818 | 2.2945   | 0.216279 |

## Frequencies

49.67 68.27 117.89 194.44 228.27 245.70 250.39 320.84 343.42 363.87  
454.49 529.93 649.65 793.38 818.00 855.44 929.75 1022.05 1061.25 1077.26  
1091.85 1096.47 1124.56 1163.01 1213.74 1292.85 1309.82 1320.79 1350.40  
1382.60 1425.52 1439.63 1446.98 1453.27 1473.41 1507.68 1523.69 1525.04  
1527.53 1530.90 1538.21 3036.58 3084.72 3114.97 3115.37 3131.64 3146.91  
3166.26 3185.55 3188.80 3191.76 3194.09 3250.38 3987.60

E(BHandHLYP)..... -311.475097

## PRODn BHandHLYP/aug-cc-pVDZ

## Cartesian Coordinates

|   |          |          |          |
|---|----------|----------|----------|
| C | -1.45973 | -0.81188 | 0.008228 |
| C | -0.6638  | 0.433207 | 0.390689 |
| C | 0.782708 | 0.148197 | 0.633461 |
| H | -1.05415 | -1.20225 | -0.92766 |
| H | -1.098   | 0.843756 | 1.310102 |
| H | 1.107236 | 0.025634 | 1.66169  |
| C | 1.69697  | -0.29452 | -0.45576 |
| C | 3.166489 | -0.01771 | -0.16019 |
| H | 3.347667 | 1.05235  | -0.04436 |
| H | 1.569889 | -1.37419 | -0.62494 |
| H | 1.4038   | 0.184669 | -1.39224 |
| H | 3.803586 | -0.38253 | -0.96727 |
| O | -0.84553 | 1.370988 | -0.66708 |
| H | -0.34525 | 2.157157 | -0.46843 |
| C | -2.95082 | -0.5494  | -0.13793 |
| H | -3.48067 | -1.46689 | -0.39924 |
| H | -3.37501 | -0.17381 | 0.796355 |
| H | -3.14083 | 0.189211 | -0.91538 |
| H | -1.28609 | -1.57145 | 0.774294 |
| H | 3.480525 | -0.51046 | 0.762545 |

## Frequencies

47.15 70.99 106.31 193.63 229.01 247.31 267.38 320.34 325.10 345.59  
 470.75 523.19 684.27 790.62 808.95 854.19 932.70 1006.49 1053.26 1081.92  
 1091.07 1099.03 1126.17 1176.25 1209.77 1292.19 1308.86 1348.87 1358.34  
 1364.61 1419.83 1441.63 1447.03 1453.56 1471.59 1507.69 1512.62 1523.54  
 1525.46 1530.75 1534.12 3036.73 3079.47 3114.75 3116.69 3125.07 3148.50  
 3165.12 3184.38 3185.44 3191.32 3213.62 3244.71 3990.60

E(BHandHLYP)..... -311.475424

C: Plot of the kinetic data for the reaction of cis-3-hexene with OH radicals using allyl ether as reference compound.  $[S]_0$  and  $[S]_t$  are the concentrations of the cis-3-hexene at times 0 and t, respectively,  $[R]_0$  and  $[R]_t$  are the concentrations of the reference compound at times 0 and t, respectively.

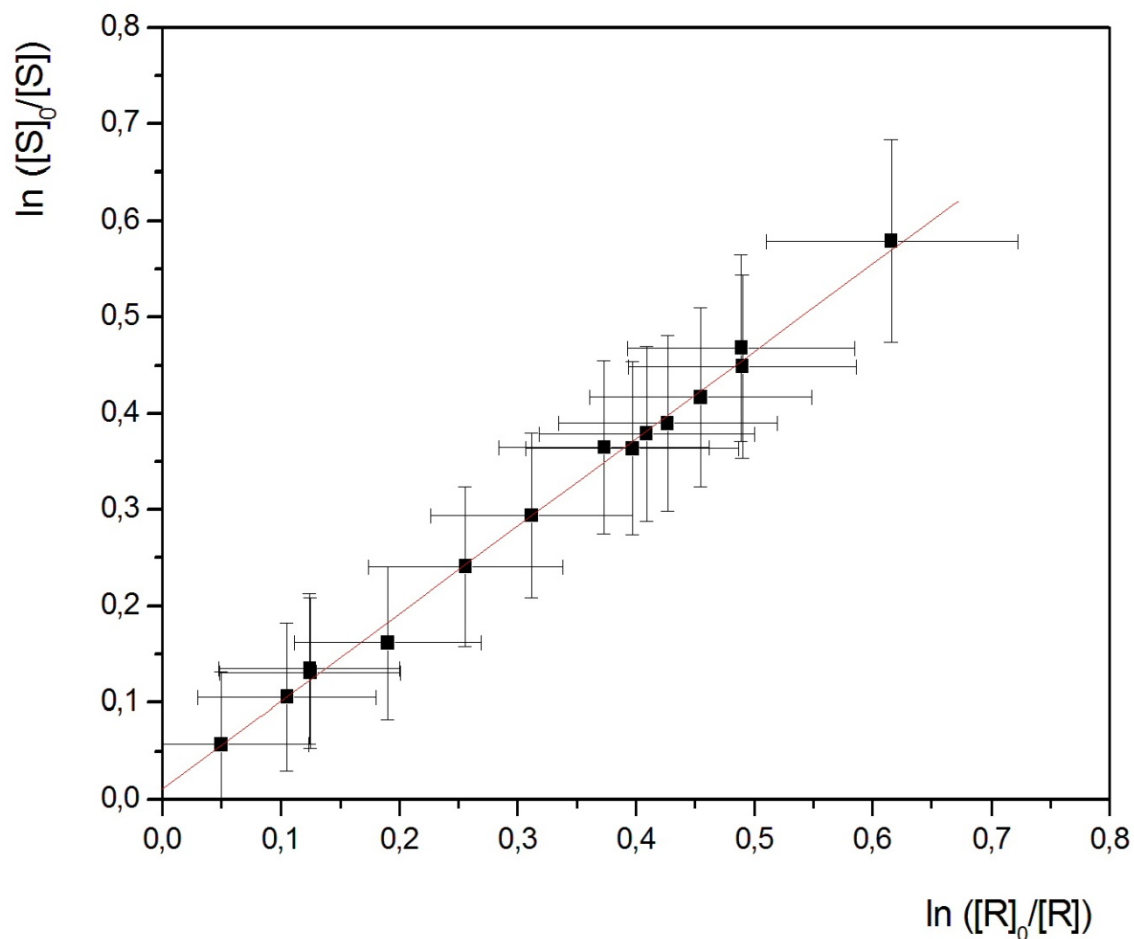

**Figure 1.** Plot of the kinetic data for the reaction of cis-3-hexene with OH radicals using allyl ether as reference compound.  $[S]_0$  and  $[S]_t$  are the concentrations of the cis-3-hexene at times 0 and t, respectively,  $[R]_0$  and  $[R]_t$  are the concentrations of the reference compound at times 0 and t, respectively.

D: Plot of the kinetic data for the reaction of cis-3-hexene with OH radicals using 3-buten-1-ol as reference compound.  $[S]_0$  and  $[S]_t$  are the concentrations of the cis-3-hexene at times 0 and t, respectively,  $[R]_0$  and  $[R]_t$  are the concentrations of the reference compound at times 0 and t, respectively.

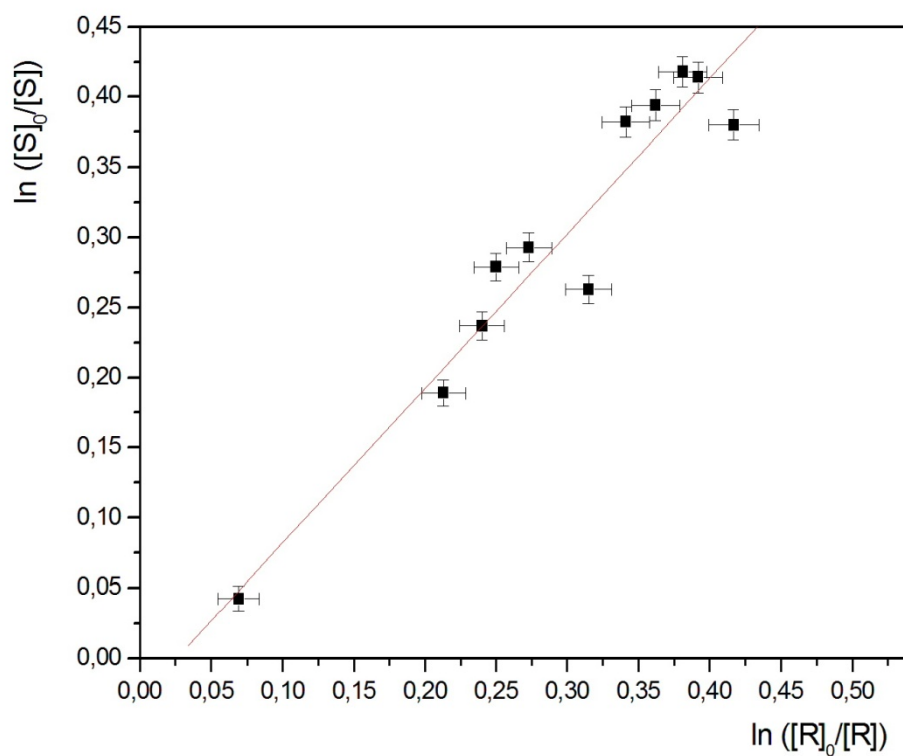

**Figure 2.** Plot of the kinetic data for the reaction of cis-3-hexene with OH radicals using 3-buten-1-ol as reference compound.  $[S]_0$  and  $[S]_t$  are the concentrations of the cis-3-hexene at times 0 and t, respectively,  $[R]_0$  and  $[R]_t$  are the concentrations of the reference compound at times 0 and t, respectively.
